# Supplementary material for: Dihydrogen intermolecular contacts in group 13 compounds: H⋯H or E⋯H (E = B, Al, Ga) interactions?
Source: Royal Society of Chemistry journal article supplement (doi:10.1039/c6dt02854c), 2017-01-01
Supplement: c6dt02854c1.pdf [file c6dt02854c1.pdf]

**Dihydrogen Intermolecular Contacts in Group 13 Compounds: H...H or E...H  
(E = B, Al, Ga) Interactions?**

Jorge Echeverría,\* Gabriel Aullón and Santiago Alvarez

Departament de Química Inorgànica and Institut de Química Teòrica i Computacional,

Universitat de Barcelona, Martí i Franquès 1-11, 08028 Barcelona (Spain).

E-mail: [Jorge.echeverria@qi.ub.es](mailto:Jorge.echeverria@qi.ub.es)

**Electronic Supplementary Information**

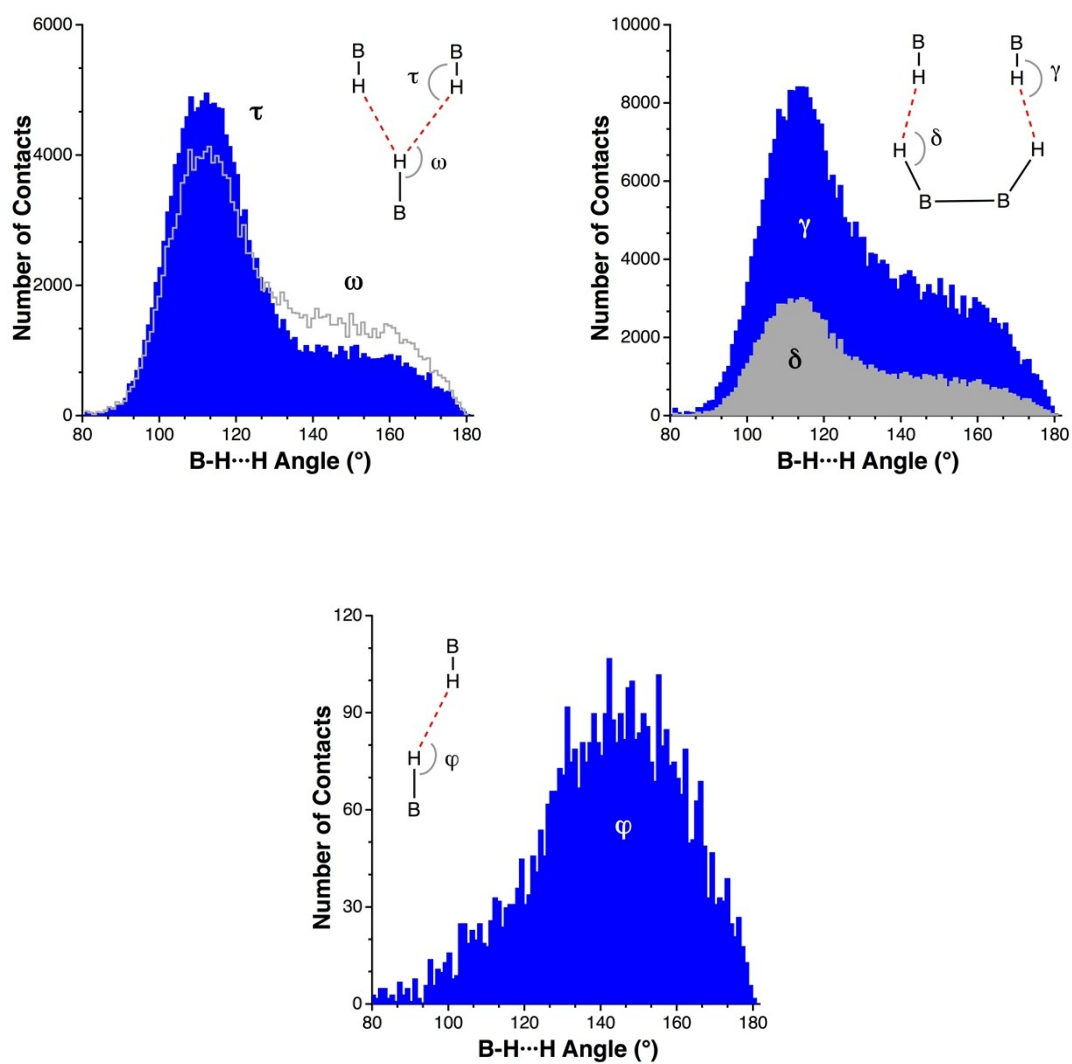

**Fig. S1.** Angular distribution of B-H...H-B intermolecular contacts at  $\leq 3.5 \text{ \AA}$  with interaction topologies 2 – 4.

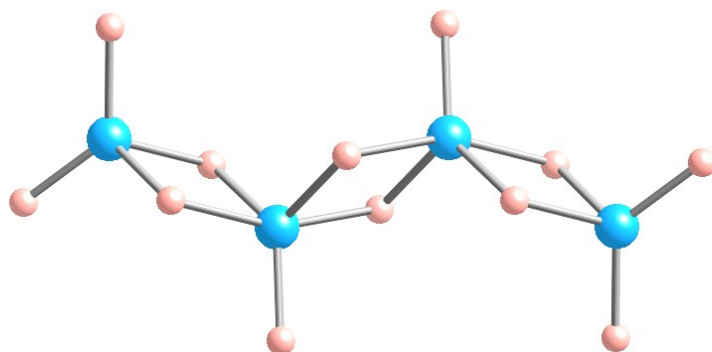

**Fig. S2.** Structure of  $\text{Al}_4\text{H}_{12}$ , a tetramer obtained from the geometry optimization of two close dialane molecules.

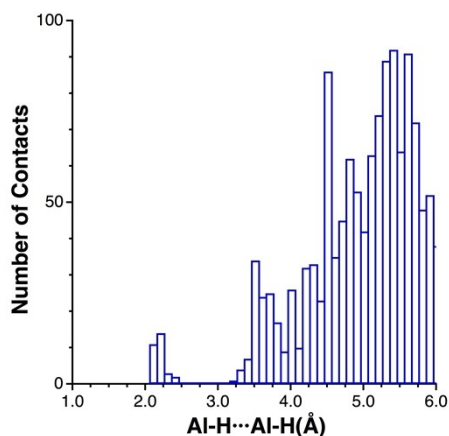

**Fig. S3.** Distribution of Al-H...Al-H short contacts in Å.

**Table S1.** Optimized Cartesian coordinates  $x, y, z$  of  $B_2H_6$ ,  $Al_2H_6$  and  $Ga_2H_6$ .

$B_2H_6$

---

|   |           |           |           |
|---|-----------|-----------|-----------|
| B | 0.212025  | -0.805265 | -0.273653 |
| H | 0.544330  | -0.126297 | 0.794461  |
| H | -0.544330 | 0.126297  | -0.794461 |
| H | 1.171089  | -0.942876 | -0.953870 |
| B | -0.212025 | 0.805265  | 0.273653  |
| H | 0.469877  | 1.717268  | -0.050357 |
| H | -0.469877 | -1.717268 | 0.050357  |
| H | -1.171089 | 0.942876  | 0.953870  |

$Al_2H_6$

---

|    |           |           |           |
|----|-----------|-----------|-----------|
| Al | 1.300464  | -0.000010 | -0.000418 |
| Al | -1.300460 | 0.000006  | 0.000418  |
| H  | 1.989910  | 1.407750  | 0.002410  |
| H  | -1.990078 | -1.407669 | -0.002415 |
| H  | 1.989734  | -1.407845 | 0.002119  |
| H  | -1.989591 | 1.407908  | -0.002111 |
| H  | 0.001694  | 0.000322  | -1.139601 |
| H  | -0.001716 | -0.000413 | 1.139606  |

$Ga_2H_6$

---

|    |           |           |           |
|----|-----------|-----------|-----------|
| Ga | -4.812774 | 0.614117  | -0.004137 |
| Ga | -2.771140 | -1.052745 | 0.010692  |
| H  | -4.435649 | 2.124959  | 0.149767  |
| H  | -3.152299 | -2.562460 | -0.142192 |

|   |           |           |           |
|---|-----------|-----------|-----------|
| H | -1.368759 | -0.379045 | 0.169982  |
| H | -6.218070 | -0.055058 | -0.163203 |
| H | -3.880923 | -0.315922 | 1.174438  |
| H | -3.707394 | -0.122398 | -1.167704 |

**Table S2.** Optimized Cartesian coordinates  $x, y, z$  of  $(\text{B}_2\text{H}_6)_2$  and  $(\text{Ga}_2\text{H}_6)_2$  with terminal-bridging interaction topology (**8b**).

$(\text{B}_2\text{H}_6)_2$

---

|   |           |           |           |
|---|-----------|-----------|-----------|
| B | 1.529000  | -0.519000 | -0.324000 |
| B | 2.807000  | -0.326000 | 0.857000  |
| B | -1.649000 | 1.042000  | 0.070000  |
| B | -2.687000 | -0.197000 | -0.603000 |
| H | 1.317000  | 0.363000  | -1.087000 |
| H | 3.018000  | -1.208000 | 1.618000  |
| H | 0.902000  | -1.524000 | -0.334000 |
| H | 3.430000  | 0.680000  | 0.864000  |
| H | 1.531000  | -0.034000 | 0.890000  |
| H | 2.802000  | -0.812000 | -0.360000 |
| H | -1.044000 | 0.799000  | 1.059000  |
| H | -3.296000 | 0.039000  | -1.590000 |
| H | -2.754000 | -1.243000 | -0.051000 |
| H | -1.572000 | 2.091000  | -0.472000 |
| H | -2.910000 | 0.756000  | 0.267000  |
| H | -1.427000 | 0.095000  | -0.805000 |

$(\text{Ga}_2\text{H}_6)_2$

---

|    |           |           |           |
|----|-----------|-----------|-----------|
| Ga | 0.821000  | -1.542000 | 0.474000  |
| Ga | 3.446000  | -1.745000 | 0.541000  |
| Ga | -0.821000 | 1.543000  | -0.475000 |
| Ga | -3.447000 | 1.744000  | -0.540000 |
| H  | 0.256000  | -1.090000 | -0.923000 |
| H  | 4.039000  | -2.211000 | 1.911000  |
| H  | 0.049000  | -1.962000 | 1.765000  |
| H  | 4.170000  | -1.337000 | -0.785000 |
| H  | 2.196000  | -0.528000 | 0.875000  |
| H  | 2.073000  | -2.768000 | 0.143000  |
| H  | -0.255000 | 1.089000  | 0.921000  |
| H  | -4.041000 | 2.211000  | -1.909000 |
| H  | -4.168000 | 1.333000  | 0.786000  |

|   |           |          |           |
|---|-----------|----------|-----------|
| H | -0.049000 | 1.966000 | -1.765000 |
| H | -2.074000 | 2.767000 | -0.142000 |
| H | -2.195000 | 0.528000 | -0.877000 |

**Table S3.** Optimized Cartesian coordinates  $x$ ,  $y$ ,  $z$  of  $(\text{B}_4\text{H}_{10})_2$  and  $(\text{B}_5\text{H}_9)_2$  with ***b-f*** and ***b-s*** interaction topologies.

$(\text{B}_4\text{H}_{10})_2$  ***b-f***

---

|   |           |           |           |
|---|-----------|-----------|-----------|
| B | 2.459874  | 1.215171  | 0.854082  |
| B | -1.694363 | 1.183040  | -0.406950 |
| B | 1.835738  | -0.506464 | 0.652769  |
| B | -2.106895 | -0.564066 | -0.803392 |
| B | 3.126130  | -1.105407 | -0.517823 |
| B | -2.676416 | -1.068759 | 0.871429  |
| B | 2.120224  | 0.417128  | -0.771206 |
| B | -3.319697 | 0.393519  | -0.043133 |
| H | 1.652565  | 2.007691  | 1.206887  |
| H | -1.691258 | 1.921110  | -1.335277 |
| H | 3.598953  | 1.356384  | 1.173001  |
| H | -0.956505 | 1.390743  | 0.505588  |
| H | 2.671284  | 1.508988  | -0.509506 |
| H | -2.867075 | 1.508051  | 0.303202  |
| H | 1.184616  | 0.557340  | -1.474845 |
| H | -4.328067 | 0.491169  | -0.645043 |
| H | 3.115137  | -0.006908 | -1.400860 |
| H | -3.512134 | 0.034963  | 1.140358  |
| H | 2.802174  | -2.031468 | -1.183241 |
| H | -3.402358 | -2.005930 | 0.896669  |
| H | 4.269409  | -0.979630 | -0.208107 |
| H | -1.943874 | -0.873529 | 1.791180  |
| H | 2.679380  | -1.421880 | 0.780871  |
| H | -1.651160 | -1.432195 | -0.026023 |
| H | 0.733017  | -0.902919 | 0.779950  |
| H | -2.414196 | -1.019898 | -1.845801 |
| H | 2.234854  | 0.091100  | 1.676431  |
| H | -1.010098 | 0.037253  | -0.853886 |

$(\text{B}_4\text{H}_{10})_2$  *b-s*

---

|   |           |           |          |
|---|-----------|-----------|----------|
| B | 0.223953  | 22.648365 | 3.494939 |
| B | 5.259620  | 23.001498 | 3.897111 |
| B | -0.787544 | 22.381622 | 5.009319 |
| B | 4.049980  | 23.896108 | 4.957533 |
| B | -1.943571 | 23.797772 | 4.787457 |
| B | 3.327165  | 24.969662 | 3.652526 |
| B | -0.108711 | 23.944513 | 4.757801 |
| B | 5.130212  | 24.835278 | 3.999614 |
| H | 1.313667  | 22.180624 | 3.535846 |
| H | 6.182800  | 22.529703 | 4.472025 |
| H | -0.335189 | 22.725463 | 2.445923 |
| H | 4.849151  | 22.468344 | 2.913675 |
| H | 0.421903  | 24.040497 | 3.627665 |
| H | 5.796735  | 24.117637 | 3.221194 |
| H | 0.606418  | 24.316323 | 5.618144 |
| H | 5.810091  | 25.582665 | 4.605821 |
| H | -0.986789 | 24.789590 | 4.478448 |
| H | 4.528185  | 25.403771 | 3.059818 |
| H | -2.462617 | 24.183172 | 5.780861 |
| H | 2.809607  | 25.959674 | 4.050940 |
| H | -2.524926 | 23.885333 | 3.751432 |
| H | 2.905549  | 24.450052 | 2.665204 |
| H | -2.030180 | 22.392197 | 4.863918 |
| H | 2.879583  | 23.953629 | 4.518231 |
| H | -0.462216 | 21.856934 | 6.012934 |
| H | 4.101684  | 24.101483 | 6.116595 |
| H | -0.615447 | 21.642931 | 4.013342 |
| H | 4.138887  | 22.677161 | 4.689685 |

$(B_5H_9)_2$  *b-f*

---

|   |           |            |            |
|---|-----------|------------|------------|
| B | 6.875668  | -18.152880 | -8.844100  |
| B | 12.074446 | -18.132051 | -8.785261  |
| B | 5.737028  | -17.748459 | -7.659108  |
| B | 5.752094  | -16.959666 | -9.266085  |
| B | 5.752759  | -19.355492 | -8.447777  |
| B | 5.767825  | -18.566697 | -10.054763 |
| B | 10.928773 | -17.728020 | -7.602857  |
| B | 10.943808 | -16.941259 | -9.206625  |
| B | 10.944071 | -19.331849 | -8.389504  |
| B | 10.959100 | -18.545085 | -9.993277  |
| H | 8.050840  | -18.147974 | -8.830647  |
| H | 13.251292 | -18.127375 | -8.771939  |
| H | 5.853535  | -17.369223 | -6.548897  |
| H | 5.882541  | -15.850317 | -9.643307  |
| H | 5.883823  | -20.463746 | -8.067564  |
| H | 5.912841  | -18.944830 | -11.161991 |
| H | 11.041894 | -17.348220 | -6.491740  |
| H | 11.070882 | -15.830998 | -9.584509  |
| H | 11.071416 | -20.441097 | -8.008745  |
| H | 11.100396 | -18.923874 | -11.101512 |
| H | 4.844430  | -16.965874 | -8.280492  |
| H | 4.844927  | -18.748100 | -7.671758  |
| H | 4.867342  | -17.574547 | -10.062593 |
| H | 4.867844  | -19.356784 | -9.453867  |
| H | 10.031522 | -16.951833 | -8.225427  |
| H | 10.031720 | -18.723080 | -7.620000  |
| H | 10.053994 | -17.557214 | -9.996540  |
| H | 10.054189 | -19.328457 | -9.391117  |

$(B_5H_9)_2$  **b-s**

---

|   |           |           |            |
|---|-----------|-----------|------------|
| B | 14.299713 | 1.241997  | -18.238019 |
| B | 19.225314 | 1.234334  | -17.621449 |
| B | 15.056459 | 0.851681  | -16.771274 |
| B | 15.431248 | -0.020185 | -18.285429 |
| B | 15.349828 | 2.409056  | -17.596944 |
| B | 15.723488 | 1.536365  | -19.108211 |
| B | 19.515203 | 0.769808  | -19.224041 |
| B | 19.456276 | 2.490971  | -18.733064 |
| B | 20.691227 | 0.438174  | -17.916967 |
| B | 20.632294 | 2.157598  | -17.426442 |
| H | 13.164377 | 1.290810  | -18.544350 |
| H | 18.346420 | 0.991505  | -16.875732 |
| H | 14.622508 | 0.539162  | -15.719861 |
| H | 15.348115 | -1.142723 | -18.638998 |
| H | 15.191003 | 3.542664  | -17.311070 |
| H | 15.919427 | 1.859912  | -20.226546 |
| H | 18.901740 | 0.100563  | -19.977157 |
| H | 18.788155 | 3.416240  | -19.031233 |
| H | 21.163100 | -0.539252 | -17.457122 |
| H | 21.049643 | 2.773461  | -16.512105 |
| H | 16.041543 | 0.002427  | -17.092570 |
| H | 15.981212 | 1.802478  | -16.582408 |
| H | 16.536471 | 0.511206  | -18.821404 |
| H | 19.870326 | 1.894858  | -19.859424 |
| H | 16.476260 | 2.307188  | -18.312386 |
| H | 20.792565 | 0.368165  | -19.251570 |
| H | 20.704926 | 2.926709  | -18.521692 |
| H | 21.624158 | 1.399830  | -17.913531 |



**Table S4.** Values of enthalpy, H, Gibbs free energy, G, in kcal mol<sup>-1</sup>, and entropy, S, in cal mol<sup>-1</sup>K<sup>-1</sup> of all calculated molecules characterized as minima.

|                                                           | H (kcal mol <sup>-1</sup> ) | G (kcal mol <sup>-1</sup> ) | S (cal K <sup>-1</sup> mol <sup>-1</sup> ) |
|-----------------------------------------------------------|-----------------------------|-----------------------------|--------------------------------------------|
| (B <sub>2</sub> H <sub>6</sub> ) <i>t-b</i>               | -66553.89                   | -66583.41                   | 99.03                                      |
| (Ga <sub>2</sub> H <sub>6</sub> ) <i>t-b</i>              | -4831862.52                 | -4831898.87                 | 121.90                                     |
| (B <sub>5</sub> H <sub>9</sub> ) <sub>2</sub> <i>b-f</i>  | -162075.73                  | -162103.76                  | 94.02                                      |
| (B <sub>4</sub> H <sub>10</sub> ) <sub>2</sub> <i>b-s</i> | -131673.82                  | -131706.73                  | 110.39                                     |
| (B <sub>4</sub> H <sub>10</sub> ) <sub>2</sub> <i>b-f</i> | -131673.46                  | -131707.59                  | 114.49                                     |
